# Supplementary material for: Morphological Variation and Spatial Metabolic Variations in Rhodiola sachalinensis A.Bor. in Different Natural Distribution Areas
Source: MDPI journal article supplement (doi:10.3390/plants13040467), 2024-02-06
Supplement: s1 [file s1]

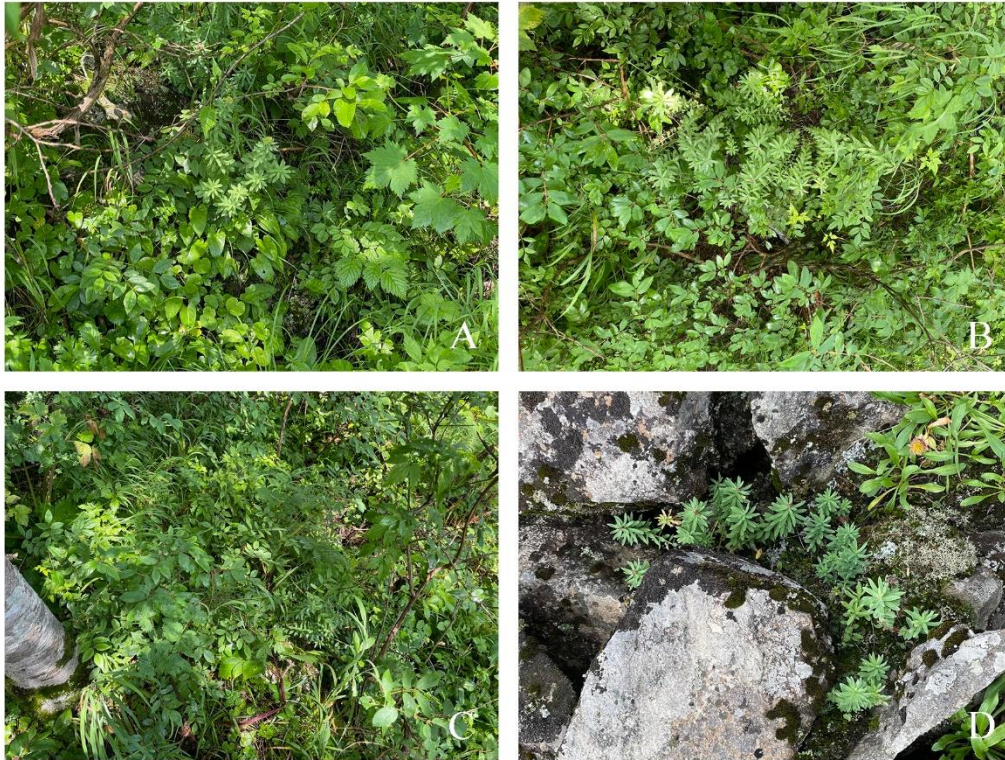

**Figure S1.** Figure A B C D shows the images of high-altitude *R. sachalinensis* species. In PingDing Mountain Region of DaHaiLin.

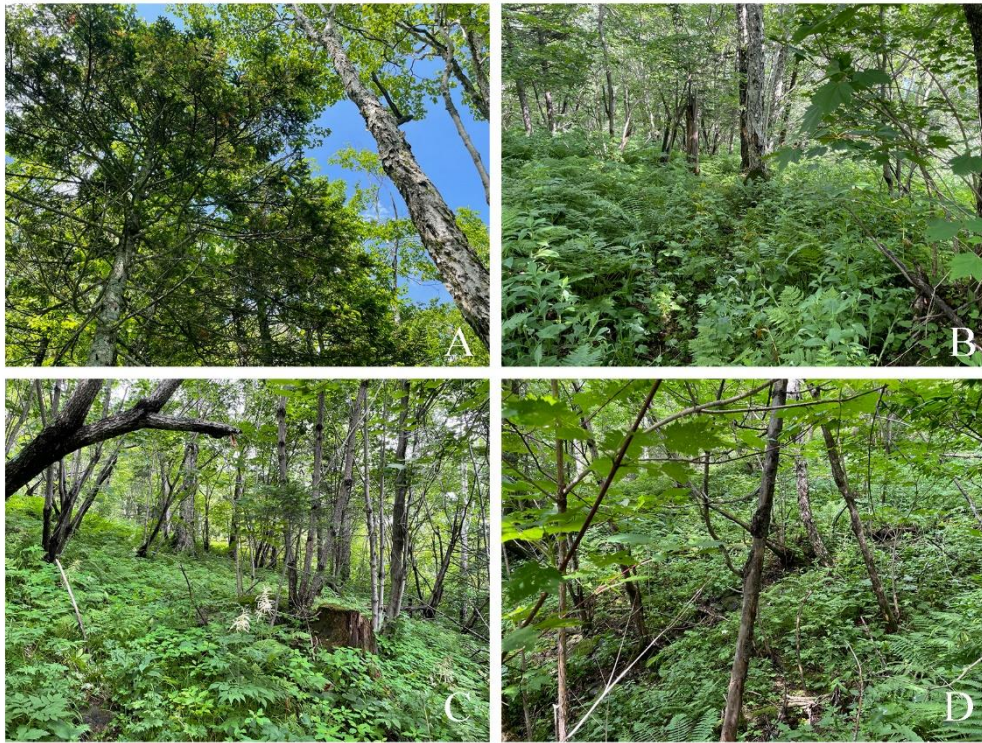

**Figure S2.** Habitat of *R. sachalinensis* in PingDing Mountain Region of DaHaiLin.



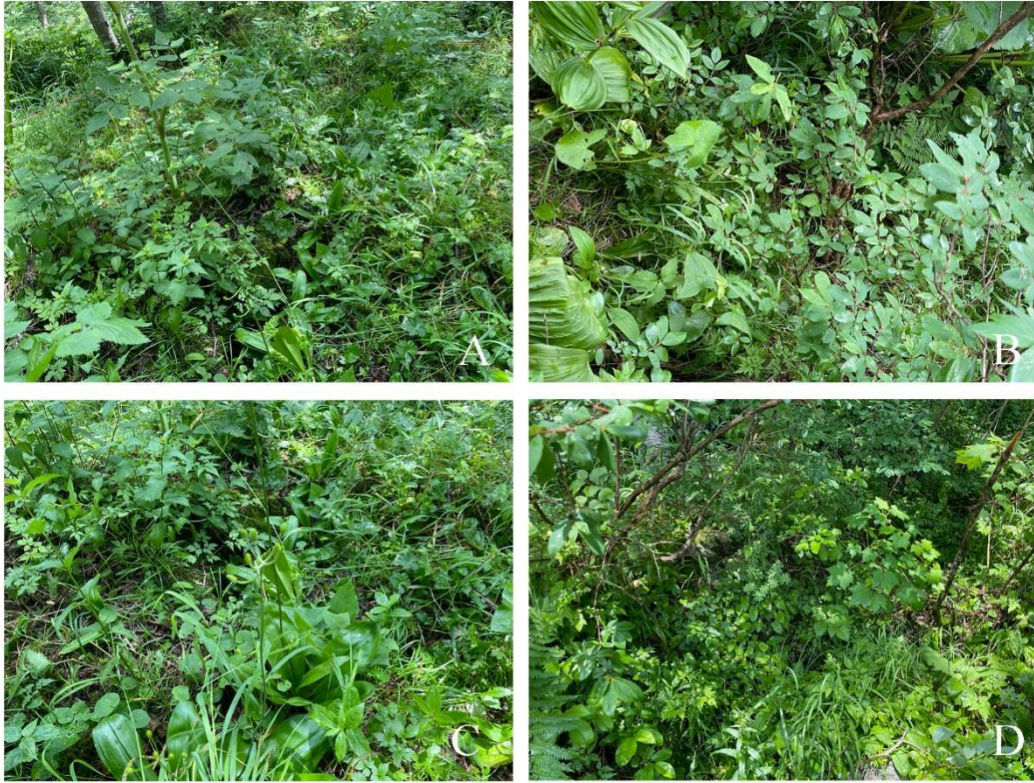

**Figure S3.** The growth of associated plants under the forest in PingDing MountainRegion of DaHaiLin.
